# Supplementary material
Source: PubMed Central journal article supplement (PMC11073648)
Supplement: NIHMS1985941-supplement-Supplemental_Material.pdf [file NIHMS1985941-supplement-Supplemental_Material.pdf]

## Supplementary Materials for

### **Two recombinant human monoclonal antibodies that protect against lethal Andes hantavirus infection in vivo**

Jose L. Garrido, Joseph Prescott, Mario Calvo, Felipe Bravo, Raymond Alvarez, Alexis Salas, Raul Riquelme, Maria L. Rioseco, Brandi N. Williamson, Elaine Haddock, Heinz Feldmann, Maria I. Barria\*

\*Corresponding author. Email: [mbarriac@udec.cl](mailto:mbarriac@udec.cl)

Published 21 November 2018, *Sci. Transl. Med.* **10**, eaat6420 (2018)  
DOI: 10.1126/scitranslmed.aat6420

#### **The PDF file includes:**

- Fig. S1. Neutralization assay.
- Fig. S2. Single-cell sorting gating strategy.
- Fig. S3. mAb binding.
- Fig. S4. Binding competition assay.

#### **Other Supplementary Material for this manuscript includes the following:**

(available at [www.sciencetranslationalmedicine.org/cgi/content/full/10/468/eaat6420/DC1](http://www.sciencetranslationalmedicine.org/cgi/content/full/10/468/eaat6420/DC1))

Table S1 (Microsoft Excel format). Primary data.

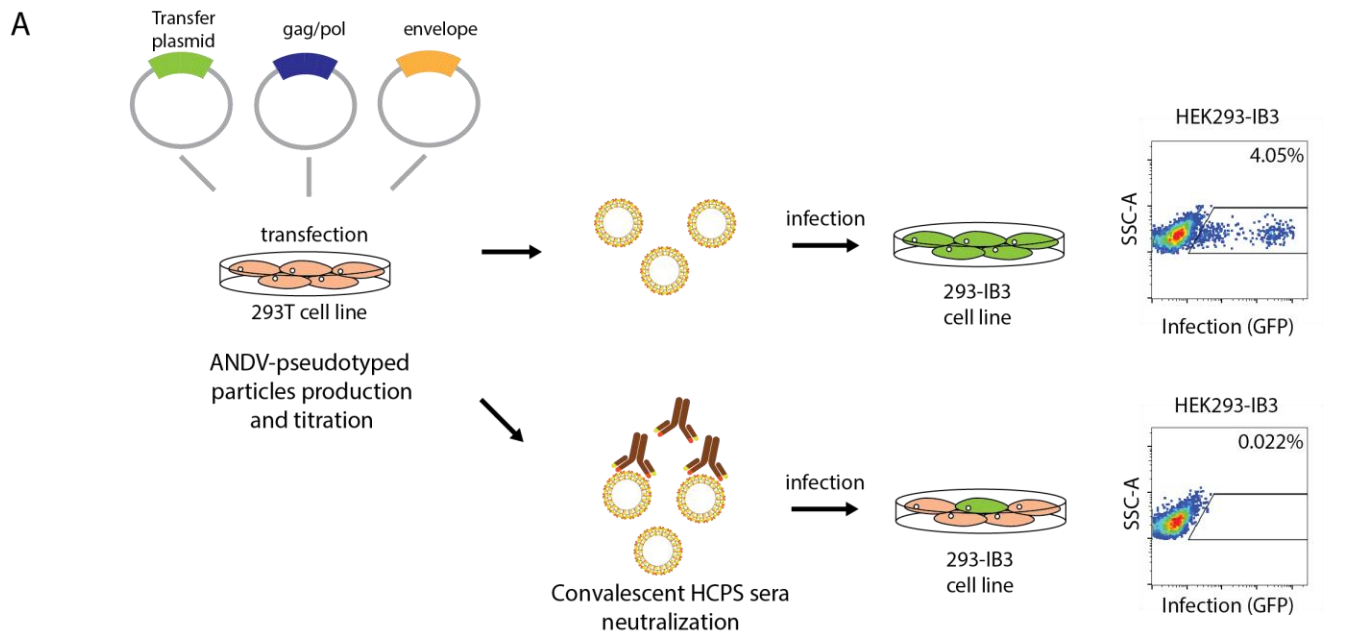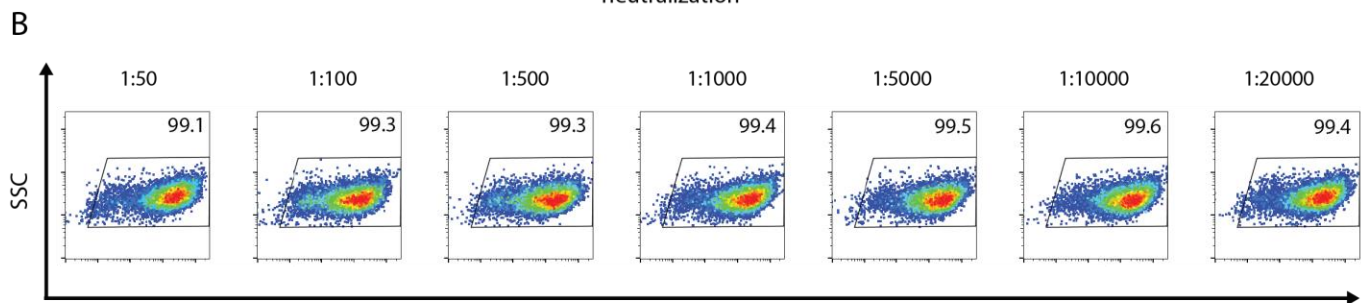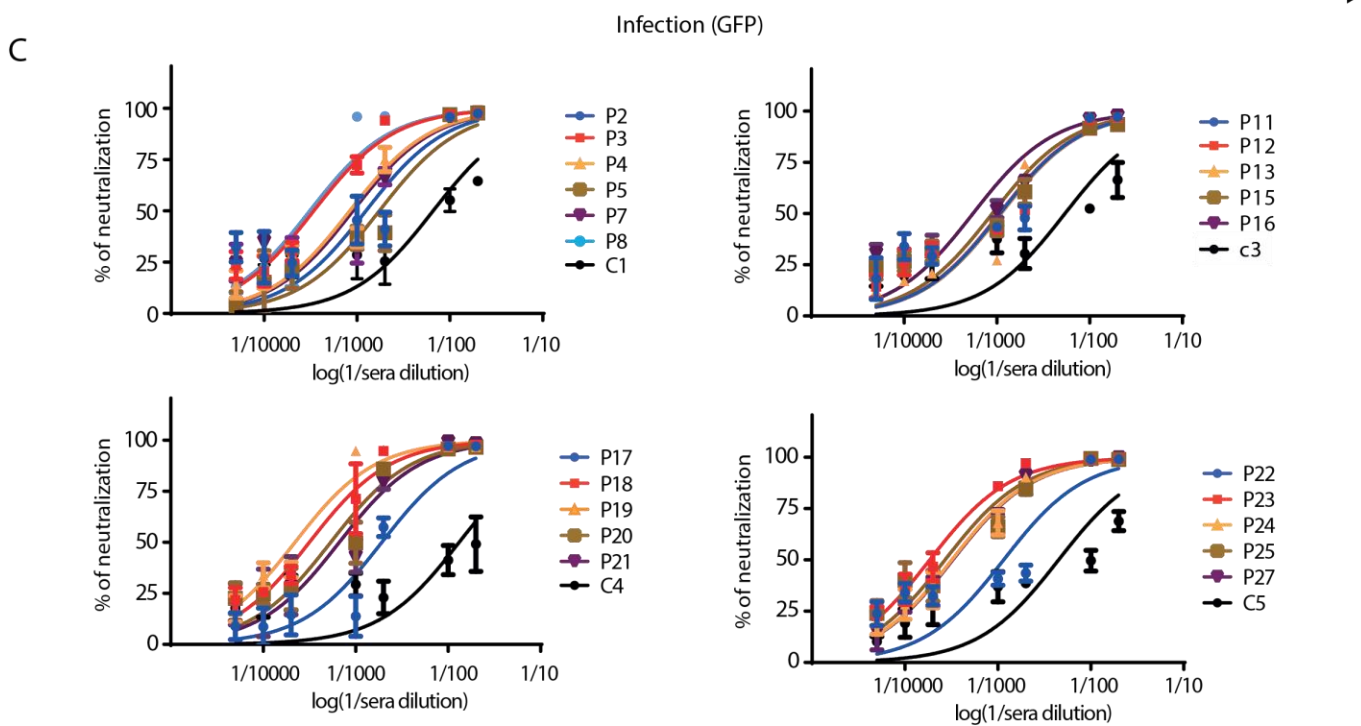

**Fig. S1. Neutralization assay.** (A) HEK293 cells stably transduced with  $\beta 3$  integrin (HEK293-IB3) were used as target cells for ANDV infection. ANDV pseudotyped particles (ANDV-pv) were incubated with different dilutions of sera from ANDV convalescent or healthy subjects and the frequency of infected cells analyzed by flow cytometry. Upon productive infection, is produce green fluorescent protein (GFP). A representative dot plot is shown. (B) As a nonspecific control of sera inhibition, VSV-G-pv were used to infect target cells in the presence of convalescent sera. VSV-G-pv were incubated with sera from ANDV convalescent subjects at different dilutions (1:50-1:20,000) and used to infect HEK293-IB3 cells. Representative dot plots are shown. (C) Neutralization curves of the ANDV convalescent (P2-P27) and healthy controls (C1-C5) sera, the y-axis displays the percentage of pseudovirus neutralization and the x-axis the reciprocal of the dilution in log.

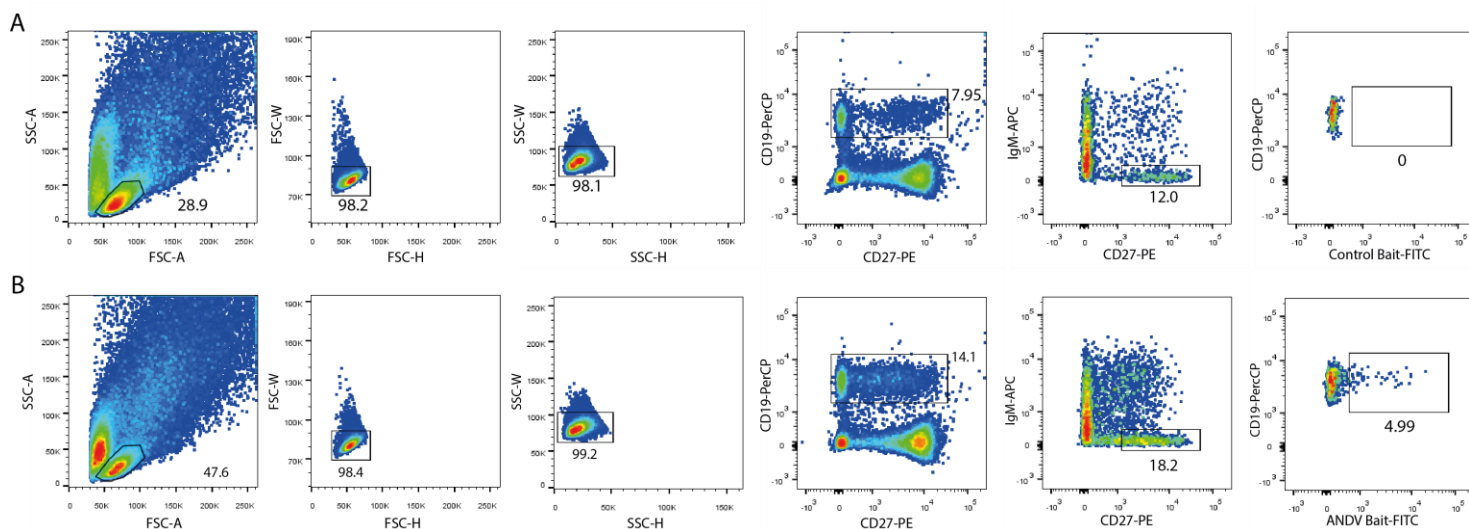

**Fig. S2. Single-cell sorting gating strategy.** PBMCs from convalescent subject P10 were stained using anti-human Abs: anti-CD19-PerCP-Vio700, anti-CD27-PE, anti-IgM-APC and a control fluorescent bait (A) or ANDV-specific fluorescent bait (B) for 30 min at 4°C. After doublet exclusion (criterion used to discard doublets and capture singlets was forward scatter height versus width and side scatter height versus width), CD19<sup>+</sup>/CD27<sup>+</sup>/IgM<sup>-</sup>/bait<sup>+</sup> cells were single cell-sorted into a 96-well polymerase chain reaction (PCR) plate using the BD FACSAria II. Data were analyzed using FlowJo v9.x.

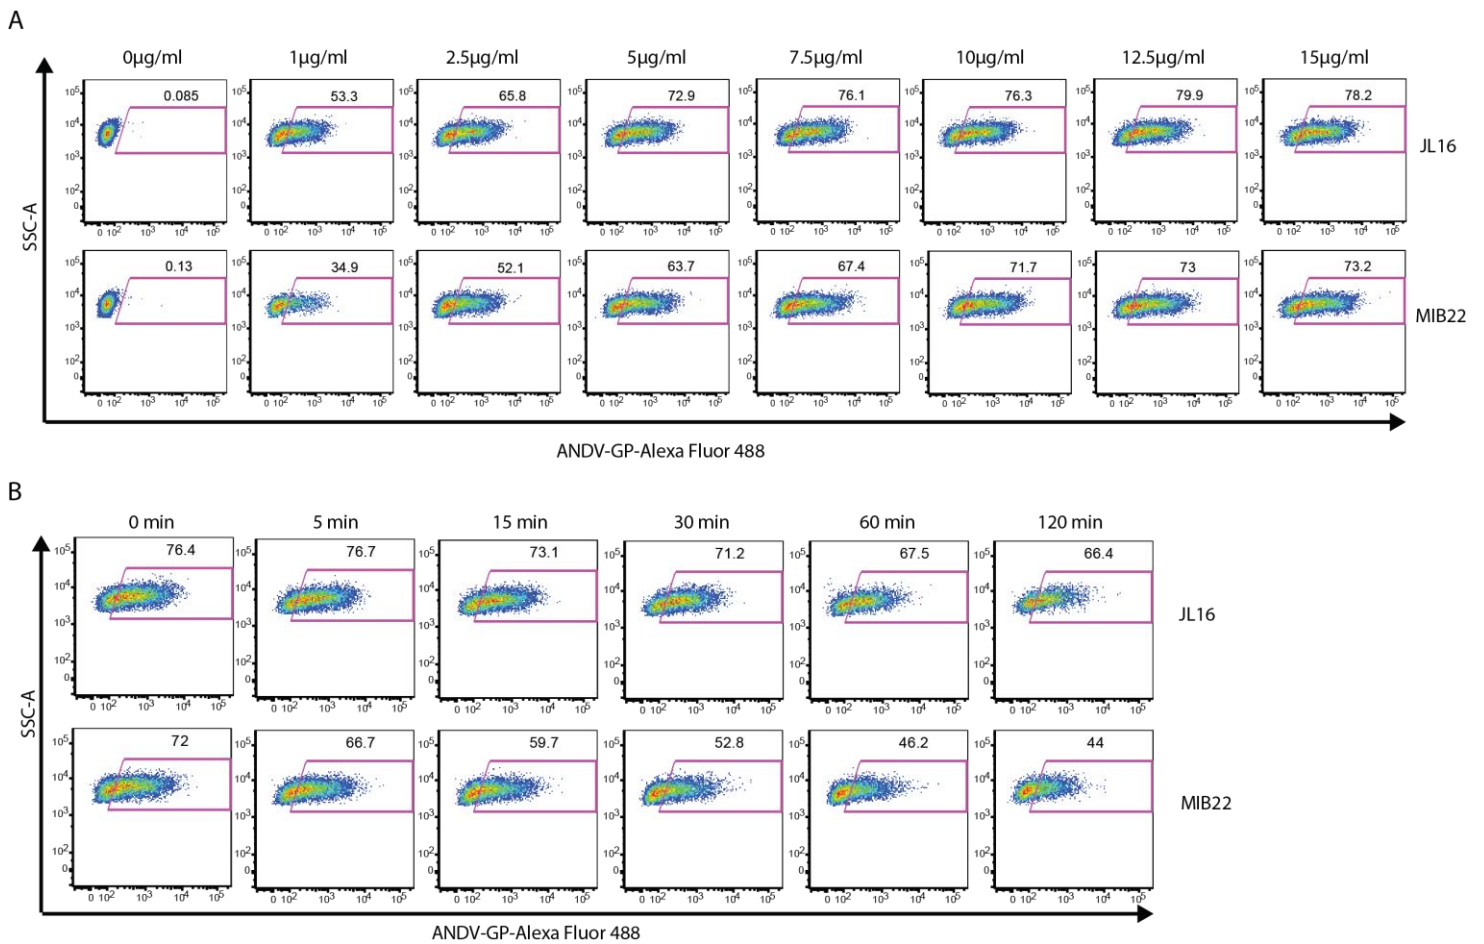

**Fig. S3. mAb binding.** (A) Representative dot plots of mAb JL16 and MIB22 staining on ANDV-GP-293T cells from 0 to 15 µg/ml, binding was detected using a secondary anti-human IgG Alexa Fluor 488 Ab and analyzed by flow cytometry. (B) Representative dot plots of mAbs JL16 and MIB22 off-rate determination; binding was determined from time 0 to 120 min.

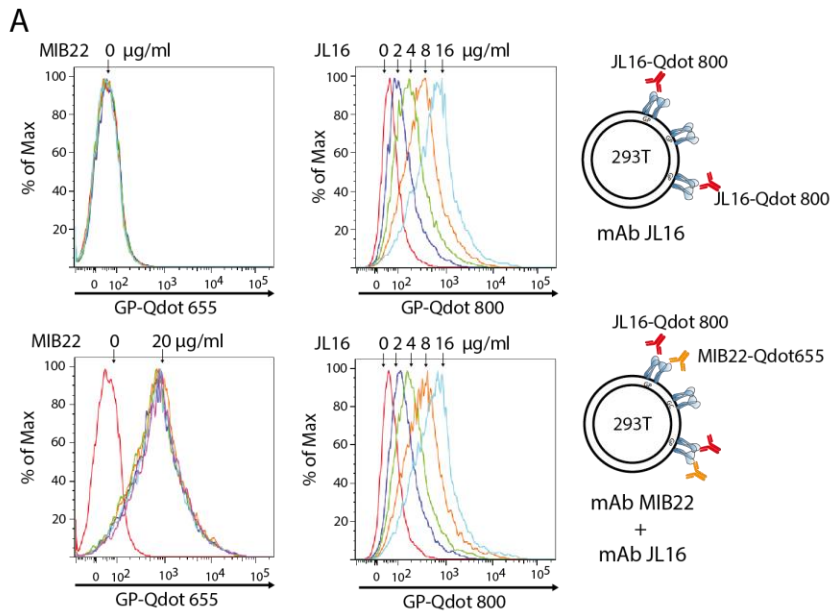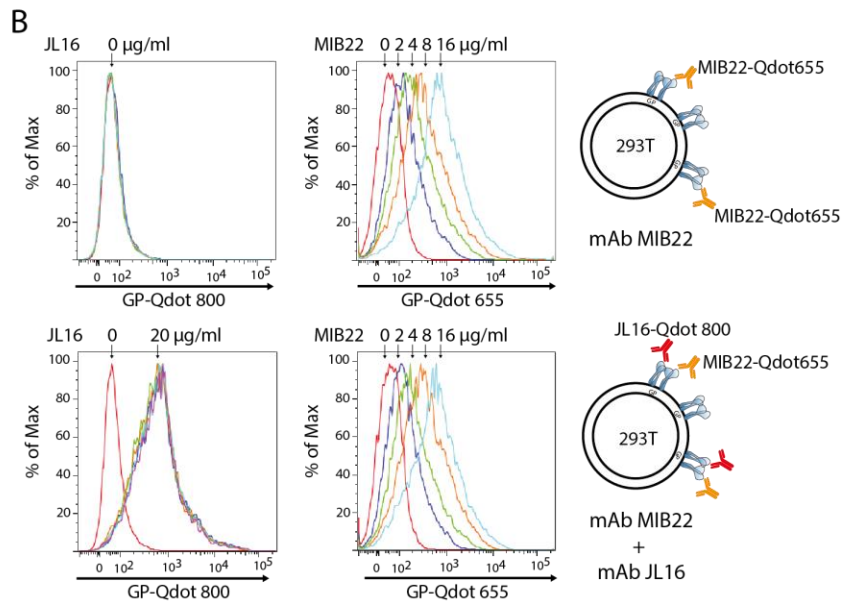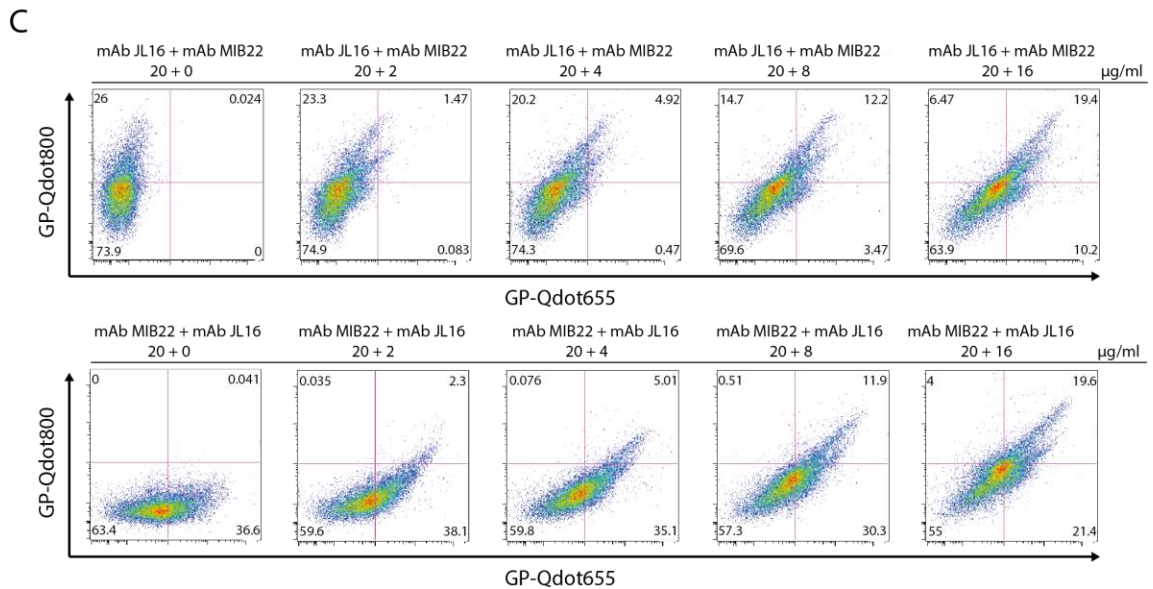

**Fig. S4. Binding competition assay.** (A) ANDV-GP-293T cells were stained with JL16-Qdot 800 from 0 to 16  $\mu\text{g/ml}$  (right upper panel). The signal of MIB22-Qdot 655 is shown as a control (left upper panel). For the binding competition assay, ANDV-GP-293T cells were stained with MIB22-Qdot 655 at 20 $\mu\text{g/ml}$  and then with JL16-Qdot 800 from 0 to 16  $\mu\text{g/ml}$  (lower panels); representative histograms and a schematic representation of the experiment are shown. (B) ANDV-GP-293T cells were stained with MIB22-Qdot 655 from 0 to 16  $\mu\text{g/ml}$  (right upper panel). The signal of JL16-Qdot 800 is shown as a control (left upper panel). For the binding competition assay, ANDV-GP-293T cells were stained with JL16-Qdot 800 at 20  $\mu\text{g/ml}$  and then with MIB22-Qdot 655 from 0 to 16  $\mu\text{g/ml}$  (below graphs), representative histograms and a schematic representation of the experiment are shown. (C) Representative dot plots of the competition assay; upper panel shows the staining of ANDV-GP-293T cells with JL16-Qdot 800 at 20  $\mu\text{g/ml}$  and increasing concentrations of MIB22-Qdot 655 (0-16  $\mu\text{g/ml}$ ) and the lower panel shows the staining of ANDV-GP-293T cells with MIB22-Qdot 655 and increasing concentrations of JL16-Qdot 800 (0-16  $\mu\text{g/ml}$ ).
